## **Feasibility of efficient smartphone-based threshold and loudness assessments in typical home settings**

Chen Xu,<sup>1</sup> Lena Schell-Majoor,<sup>1</sup> and Birger Kollmeier<sup>1</sup>

<sup>1</sup> *Medizinische Physik and Cluster of Excellence Hearing4all, Universität Oldenburg, D-26111 Oldenburg, Germany*

Ambient noise is a critical factor affecting the precision of mobile hearing tests conducted in home environments. Monitoring noise levels during out-of-booth measurements provides essential information about the suitability of the setting for accurate audiometric testing. When ambient noise is controlled, results are expected to be comparable to in-booth measurements. This study remotely conducted air-conduction pure-tone audiometry and adaptive categorical loudness scaling (ACALOS) tests at 0.25, 1, and 4 kHz using a smartphone, while an integrated microphone and a dosimeter app were used to quantify ambient noise levels. Additionally, a reinforced ACALOS (rACALOS) method was proposed to integrate threshold measurement into the ACALOS procedure. The rACALOS method not only improves the accuracy of threshold estimation but also increases efficiency by combining two independent procedures into a single, streamlined process. As a result, ambient noise levels were mostly below the maximum permissible level. Hearing tests conducted via smartphone demonstrated moderate-to-excellent reliability, with intraclass correlation coefficients (ICCs) exceeding 0.75, and strong validity, with biases of less than 1 dB. In simulations, the rACALOS method reduced the bias towards pre-assumed thresholds, and in behavioral experiments, it showed a stronger correlation with pure-tone audiometric thresholds than the baseline method. Overall, this study demonstrates that

administering pure-tone audiometry and ACALOS tests at home is feasible, valid, efficient, and reliable when ambient noise is sufficiently low.

Keywords: remote audiology; ambient noise; validity and reliability; categorical loudness scaling

*Corresponding author: Chen Xu*

*Contact:*

*chen.xu@uni-oldenburg.de*

*Department of Medical Physics and Acoustics, Faculty VI*

*Carl von Ossietzky Universität Oldenburg, 26111, Oldenburg, Germany*

## **ACKNOWLEDGMENTS**

This work was funded by the Deutsche Forschungsgemeinschaft (DFG, German Research Foundation) under Germany's Excellence Strategy – EXC 2177/1 - Project ID 390895286.

## **DECLARATION OF CONFLICTING INTERESTS**

The authors declare that there is no conflict of interest.

## 1 INTRODUCTION

2 Despite the benefits of easy access and early diagnosis, a significant concern with mobile  
3 hearing tests is the lack of what Zhao et al. (2022) refer to as ‘auditory hygiene’. In laboratory  
4 settings, optimal auditory hygiene is ensured through the use of soundproof booths, calibrated  
5 equipment, attentive participants, and supervision by trained personnel. In contrast, mobile  
6 audiometric tests conducted in home environments typically lack these controlled conditions,  
7 which may compromise the accuracy of the results. Thus, it is important to investigate the impact  
8 of this reduced auditory hygiene on the reliability of mobile hearing assessments.

9 Previous studies have demonstrated that conducting hearing tests outside of sound-treated  
10 booths can be feasible under certain conditions. Behar et al. (2021) reviewed audiometric  
11 assessments performed without booths and highlighted several viable solutions, such as testing in  
12 quiet environments with sound-attenuating headphones, using insert earphones or over-the-ear  
13 earmuffs, and employing active noise reduction earmuffs (MacLennan-Smith et al., 2013;  
14 Swanepoel et al., 2015; Brennan-Jones et al., 2016; Clark et al., 2017). Furthermore, recent  
15 research (e.g., Margolis et al., 2022; Meinke & Martin, 2023) has proposed standards for  
16 defining the maximum permissible ambient noise levels (MPANLs) for audiometric test rooms,  
17 based on the use of specific earphones (e.g., insert, supra-aural, circumaural). If ambient noise  
18 does not exceed the MPANL for a given earphone type, the environment is generally considered  
19 suitable for accurate audiometric testing.

20 In addition to the test environment, the choice of hearing assessment is another key  
21 consideration. Almufarrij et al. (2022) reviewed 187 web- and app-based tools for remote  
22 hearing tests, finding that pure-tone audiometry and speech-in-noise tests dominate the landscape,  
23 representing 49% and 22% of all tools, respectively. However, to our knowledge, only a few

24 studies (e.g., Kopun et al., 2022) have explored the remote application of categorical loudness  
25 scaling (CLS), a supra-threshold test widely used in clinical audiology for diagnostics and  
26 hearing device fitting. While Kopun et al. (2022) demonstrated the preliminary feasibility of  
27 conducting CLS remotely, three major limitations emerged: (1) the equipment used for remote  
28 testing was a laptop rather than a smartphone, (2) only five participants ( $N = 5$ ) were involved in  
29 the validation study, and (3) the reliability of CLS data collected in remote settings was  
30 suboptimal and requires improvement. To address these limitations, we extended the work of  
31 Kopun et al. (2022) by increasing the sample of young adults with normal hearing, optimizing  
32 the original CLS method for use with smartphones, and by integrating an audiogram  
33 measurement procedure into the CLS procedure.

34 As reported in Almufarrij et al. (2022), only 12% of hearing assessment tools have  
35 undergone validation and evaluation through peer-reviewed publications, highlighting that the  
36 validity and test-retest reliability of most tools available in app stores remain unknown.  
37 Consequently, the methods for quantifying validity and reliability of audiometric tests in home  
38 environments should be clearly defined, and results on both validity and test-retest reliability  
39 must be reported. Specifically, Bland-Altman plots are often used to validate audiometric tests,  
40 such as the matrix sentence test via smart speaker (Ooster et al., 2020) or categorical loudness  
41 scaling (CLS) (Fultz et al., 2020). For test-retest reliability, intraclass correlation coefficients  
42 (ICC) are typically used to assess agreement between repeated measures (Koo & Li, 2016).  
43 Specifically for CLS, Rasetshwane et al. (2015) and Kopun et al. (2022) introduced within-run  
44 variability and across-run bias as additional measures for assessing reliability in a home  
45 environment. In the present study, we incorporate not only basic metrics such as correlation  
46 coefficient ( $R$ ), bias, and root-mean-squared-error (RMSE), but also advanced statistical

47 measures from previous studies to comprehensively report the validity and test-retest reliability  
48 of smartphone-based audiometric tests.

49 The adaptive CLS procedure (ACALOS, Brand & Hohmann, 2002; ISO 16832, 2006) often  
50 inaccurately estimates the audiometric threshold, as indicated by a correlation coefficient of less  
51 than 0.5 between the ‘true’ audiometric and estimated thresholds, reflecting a weak correlation.  
52 Please note that the thresholds estimated by CLS (hereafter referred to as 'CLS thresholds') are  
53 defined as the level corresponding to 2.5 categorical units (CU) on the loudness growth function,  
54 as outlined by Oetting et al. (2014). Oetting et al. (2014) further demonstrated that the threshold  
55 predicted by the ACALOS method did not coincide with the ‘true’ audiometric threshold. This  
56 discrepancy may be at least partially attributed to the use of different stimuli—narrow-band  
57 noise in ACALOS versus pulsed tones in audiometry—and distinct psychophysical paradigms,  
58 namely, categorical magnitude estimation in ACALOS versus target sound detection in  
59 audiometry. To reduce this discrepancy, our study introduces a reinforced ACALOS (rACALOS)  
60 method, which integrates a more accurate threshold estimation process within the ACALOS  
61 procedure. This rACALOS approach allows participants to perform both threshold and ACALOS  
62 measurements in a single procedure rather than separate tests, thereby increasing efficiency.  
63 Additionally, the rACALOS method enhances reliability at low SPLs near the hearing threshold  
64 by incorporating additional trials with the aim to provide a more accurate estimate of the ‘true’  
65 hearing threshold which is usually directly assessed in pure-tone audiometry.

66 To accurately estimate the 'true' hearing threshold as a reference, it is essential to account for  
67 as many influencing factors as possible. In our previous work, we investigated the impact of  
68 experimenter supervision on pure-tone audiometry and adaptive categorical loudness scaling  
69 (ACALOS) outcomes using a smartphone-based application in a sound-attenuated booth with

70 both normal-hearing (NH) and hearing-impaired (HI) listeners (Xu et al., 2024b). Our findings  
71 indicated that experimenter supervision had no significant effect (Xu et al., 2024b). Additionally,  
72 to address potential distractions for listeners, we proposed and simulated a model-free adaptive  
73 procedure for robust and efficient threshold estimation—the graded response bracketing (GRaBr)  
74 approach (Xu et al., 2024a). The present study aims to further validate GRaBr by comparing its  
75 performance with established baseline methods in human participants.

76 Taken together, the primary objectives of this study are: 1) to experimentally evaluate the  
77 performance of the novel, efficient GRaBr and rACALOS methods in human participants; 2) to  
78 assess the validity and test-retest reliability of the smartphone-based application for pure-tone  
79 audiometry and ACALOS in a home environment with some degree of background noise, given  
80 the absence of a sound booth.

## 81 **METHODS**

### 82 **Participants**

83 Fifteen young adults with normal hearing (aged 20 to 35 years; 4 males, 11 females)  
84 participated in this study. All participants were members of working groups or students at the  
85 University of Oldenburg, recruited primarily through verbal announcements. The three authors  
86 did not participate in the study. All participants self-reported no hearing issues and were  
87 presumed to have normal hearing (NH). Two inclusion criteria were applied: (i) an air-  
88 conduction pure-tone average (PTA-4) at 0.5, 1, 2, and 4 kHz in the better ear had to be less than  
89 or equal to 20 dB HL, and (ii) symmetric hearing, defined as a threshold difference of no more  
90 than 20 dB between ears at any test frequency. All 15 participants met these criteria. Some  
91 listeners (N = 5) received compensation of €12 per hour for their participation, while others took

92 part as part of their work duties. The study was approved by the Research Ethics Committee of  
93 the University of Oldenburg (Drs. EK/2023/004).

#### 94 **Equipment, Procedure, and Environment**

95 Prior to the start of remote testing, a test kit was assembled (see supplemental materials),  
96 which included a smartphone (OnePlus, Android), a USB-C charger, and HD650 circumaural  
97 headphones (Sennheiser, Wedemark, Hanover, Germany). The smartphone and headphones were  
98 pre-calibrated using a Brüel & Kjær (B&K) artificial ear 4153, a B&K 0.5-inch microphone  
99 4134, a B&K microphone pre-amplifier 2669, and a B&K measuring amplifier 2610, with a  
100 target calibration level of 80 dB SPL. Upon handing over the test kit, participants received a brief  
101 oral explanation of the remote experiments, and consent forms were signed before they began.  
102 Participants could initiate testing at home by connecting to the internet via WLAN and accessing  
103 the provided website. For data security, a VPN connection was established using the  
104 ‘GlobalProtect’ app when accessing the site. The workflow of the web-based application for  
105 remote testing was described in Xu et al. (2024b). A Raspberry Pi 3 Model B (Raspberry Pi  
106 Foundation, UK), a Linux-based microcontroller, served as the server hosting the measurement  
107 site. All behavioral data were stored on an SD card within the Raspberry Pi, located at the  
108 University of Oldenburg.

109 The tele-health model, following the definition in Robler et al. (2022), was a self-testing  
110 model, requiring participants to complete all remote measurements within one week and return  
111 the test kit. The home environments were primarily located in rural regions of northwestern  
112 Germany, including cities such as Oldenburg, Cloppenburg, Jever, and Bad Zwischenahn.

## 113        **Noise Level Measurement**

114        The smartphone app "Decibel X" (SkyPaw Co., Ltd) was used to measure ambient noise  
115        levels and is freely available for download on the Google Play store. The app was configured  
116        with an A-weighted frequency filter and a slow time weighting of 500 ms. Real-time, average,  
117        and maximum environmental noise levels were displayed on the smartphone screen, but no  
118        sound files were recorded during the measurement. A digital sound level meter (Votcraft SL-  
119        100), with an accuracy of  $\pm 2$  dB at 1 kHz and compliant with the EN 60651 Class 3 standard,  
120        was used to calibrate the smartphone's integrated microphone. The smartphone app's parameters,  
121        including the A-weighted filter and slow time weighting were set as closely as possible to match  
122        the digital sound level meter. The app was then calibrated with a linear gain adjustment of 13.7  
123        dB. Please note that the same smartphone and headphones were provided to all test participants,  
124        ensuring a consistent gain across measurements. Calibration stimuli consisted of narrowband  
125        noise signals fixed at 80 dB SPL.

126        At the start of each measurement session, the participants were required to document the  
127        current ambient noise level (see supplementary materials for remote measurement guidelines). A  
128        total of 24 sessions were conducted, consisting of 4 listening tests (SIUD, GRaBr, ACALOS, and  
129        rACALOS; see details below) across 3 test frequencies (0.25, 1, and 4 kHz) and 2 runs (test and  
130        retest), presented in randomized order. Participants were allowed to take short breaks between  
131        sessions. No specific instructions were provided regarding how to hold the smartphone during  
132        ambient noise measurement. Although participants were encouraged (but not required) to  
133        complete all sessions in the morning or evening, they were strongly advised to monitor the real-  
134        time noise level using the "Decibel X" app throughout each session. If the real-time noise level  
135        exceeded 45 dB(A), participants were instructed to pause testing until the noise level fell below



136 this threshold. A limit of 45 dB(A) was chosen based on Kopun et al. (2022), who demonstrated  
137 that remote CLS results are comparable to in-lab CLS measurements when ambient noise is kept  
138 below 50 dB(A). Additionally, the time and location of each remote session were recorded.

## 139 **Listening Tests**

### 140 *Pure-tone audiometry*

141 Two adaptive methods, the single-interval up-down (SIUD) procedure and the graded  
142 response bracketing (GRaBr) approach, were used to measure air-conduction pure-tone hearing  
143 thresholds (Lecluyse et al., 2009; Xu et al., 2024a). Xu et al. (2024a) conducted computer  
144 simulations demonstrating that GRaBr significantly outperformed the established SIUD method  
145 in terms of robustness against both long- and short-term inattention, as well as efficiency. In this  
146 study, the self-administered listening tests conducted at home present an ideal scenario for using  
147 an inattention-aware method like GRaBr, as participants are no longer supervised by an  
148 experimenter and are therefore supposed to be more susceptible to distractions.

149 In both procedures, listeners were presented with two tones, one tone, or silence, and were  
150 required to indicate how many tones they heard. The sound level was adjusted adaptively based  
151 on the participants' responses: the task became more challenging following correct answers and  
152 easier after incorrect responses. The primary distinction between SIUD and GRaBr lies in the  
153 level difference between the two tones presented in most trials: fixed at 10 dB for SIUD, but  
154 variable for GRaBr. To ensure a fair comparison between the two methods, key parameters, such  
155 as the minimum number of trials, number of reversals, and starting level, were matched as  
156 closely as possible. Both procedures commenced with a cue tone set at 60 dB HL with a random  
157 bias of less than 5 dB and terminated after a minimum of 14 reversals and 10 trials. For both  
158 methods, the first four reversals in each track were discarded.

159 Each pure tone lasted 0.2 s, with cosine ramps of 0.02 s and a 0.3 s interval between tones.  
160 Test frequencies of 0.25, 1, and 4 kHz were used for the stimuli. In SIUD, the correct response  
161 rates were fitted to an S-shaped logistic psychometric function, and the level at the 50% correct  
162 response point ( $L_{50}$ ) was estimated as the hearing threshold. For GRaBr, responses from the  
163 upper and lower tracks were fitted to two independent psychometric functions, and the hearing  
164 threshold was calculated as the mean level at the 50% correct response point of both functions  
165 (i.e.,  $0.5*(L_{50,upper} + L_{50,lower})$ ). To assess test-retest reliability, both methods (SIUD and GRaBr)  
166 were repeated, with the test and retest referred to as Run 1 and Run 2, respectively. No specific  
167 time interval was recommended between the test and retest; participants were simply instructed  
168 to complete both runs within one week.

### 169 ***Adaptive categorical loudness scaling***

170 The adaptive categorical loudness scaling (ACALOS) method was used to assess the  
171 loudness growth function (Brand & Hohmann, 2002; ISO 16832, 2006). In the ACALOS task,  
172 participants rated the loudness of stimuli on an 11-point scale with descriptors ranging  
173 from 'very soft', "soft", "medium", "loud", and "very loud" with 4 unnamed intermediate  
174 categories in between, plus the two limiting categories "not heard", and "too loud". The stimulus  
175 levels, ranging from -10 to 105 dB, were presented in a pseudo-random order following an initial  
176 estimation of the user-specific dynamic range (Phase I, see Fig. 1), which was updated to obtain  
177 a more representative placement of test level in Phase II, encompassing 26 trials. At the end of  
178 the procedure, a loudness growth function was modeled by fitting two linear segments and a  
179 transition region using a Bezier fit, following the BTUX fitting method (Oetting et al., 2014).

180 However, applying ACALOS without modifications in a mobile setting for remote testing  
181 may pose challenges. Fluctuating ambient noise in home environments could affect loudness

182 judgments at low sound pressure levels (SPL). Furthermore, as a supra-threshold measure of  
183 loudness perception, ACALOS often fails to provide reliable categorical loudness estimates near  
184 the hearing threshold (Oetting et al., 2014). Oetting et al. (2014) reported that the mean intra-  
185 subject standard deviation of loudness levels close to the threshold was notably high (around 10  
186 dB), yielding significant variability in the hearing threshold estimation from loudness judgments  
187 near the threshold.

188 To address the limitations of ACALOS near the hearing threshold, a modified method,  
189 reinforced adaptive categorical loudness scaling (rACALOS), was introduced to improve the  
190 accuracy of hearing threshold level (HTL) estimation. An example run is shown in Fig. 1. The  
191 rACALOS followed the same adaptive rules as ACALOS during Phases I and II (see above) but  
192 presented additional stimuli near the hearing threshold to better estimate HTL. The starting level  
193 of Phase III was set at the minimum level reached in Phases I and II, plus 5 dB. In this phase, a  
194 one-up-one-down adaptive rule was applied: the stimulus level increased by 5 dB if participants  
195 responded with "not heard" and decreased by 5 dB if they selected other loudness categories (e.g.,  
196 "very soft," "medium"). Phase III consisted of 10 trials.

197 The stimuli used were one-third-octave-band low-noise noises centered at 0.25, 1, and 4 kHz  
198 (Kohlrausch et al., 1997). Each noise stimulus had a duration of 1 second with 0.05-second rise  
199 and fall ramps. To assess reliability, participants repeated both ACALOS and rACALOS  
200 measurements at all frequencies for both test and retest conditions.

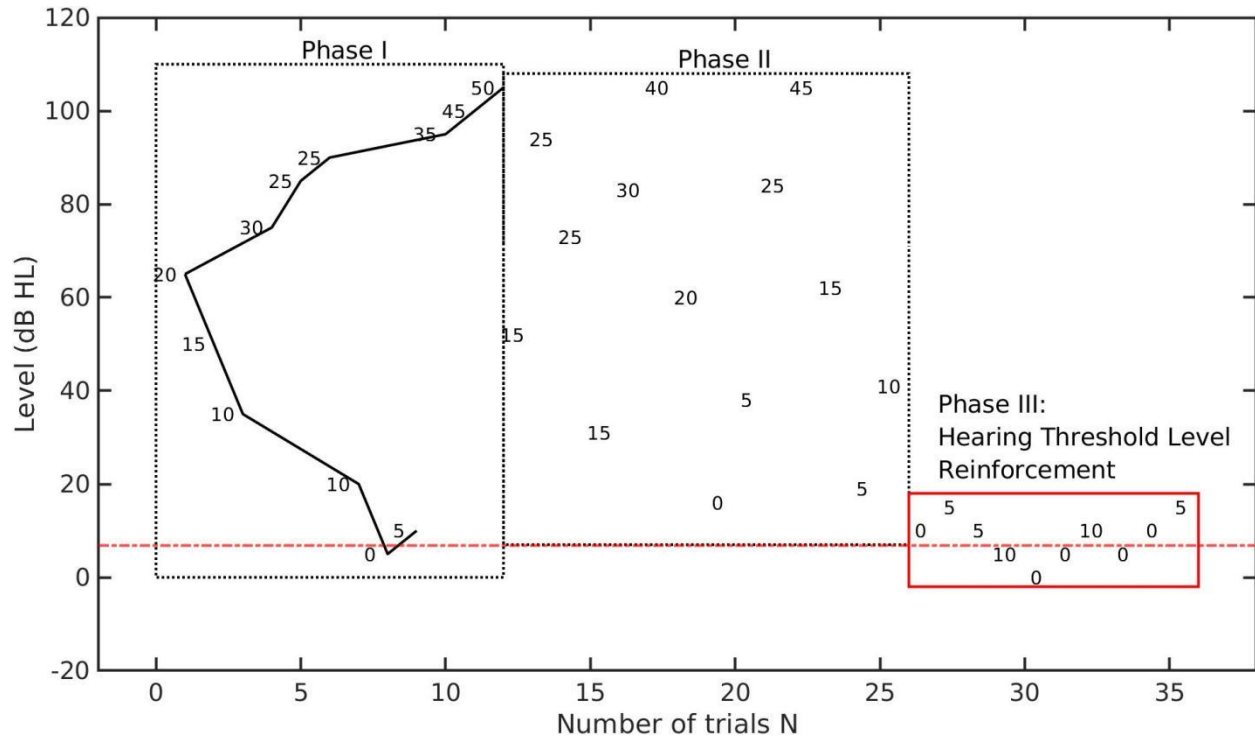

201

202 Fig. 1. An example track of the reinforced adaptive categorical loudness scaling (rCALOS),  
203 where the level (in dB HL) is plotted as a function of the number of trials N. The listener's  
204 response (in categorical units (CU)) is annotated with numbers between 0 ('not heard') and 50  
205 ('too loud'). Left dotted rectangle region: Phase I ('dynamic range estimation'); Middle dotted  
206 rectangle region: Phase II ('presenting and re-estimation'); Right solid red rectangle region:  
207 Phase III ('hearing threshold level reinforcement'); Red dash-dotted line: target threshold. In  
208 Phase III, the step size is set to 5 dB, and the number of trials is set to 10.

## 209 Accuracy of HTL estimation for the rACALOS procedure

### 210 Computer simulations

211 Monte-Carlo simulations were conducted to compare the baseline ACALOS and rACALOS  
212 in terms of accuracy in estimating the hearing threshold level (HTL). The statistical behavior of  
213 the virtual listener was based on the models described by Brand et al. (2000) and Oetting et al.  
214 (2014), assuming a normal distribution. The mean response of the virtual listener was modeled

215 using a three-parameter loudness function consisting of two linear segments with slopes  $m_{low}$  and  
216  $m_{high}$  , and a smoothed transition region between 15 and 35 categorical units (CU). A standard  
217 deviation of 4 CU, derived from empirical data in Brand et al. (2000), was employed. The  
218 simulated loudness judgment was drawn from a normal distribution defined by this mean  
219 (loudness function) and the standard deviation (4 CU) for a given presentation level L.

220 The simulated loudness responses were constrained to the range of 0 to 50 CU and rounded  
221 to the nearest 5 CU. The target loudness function parameters were set to 84.1 dB HL for  $L_{cu}$ , 0.3  
222 for  $m_{low}$ , and 1.0 for  $m_{high}$ . Phase III of the rACALOS procedure varied the number of trials (N)  
223 between 10 and 30 in increments of 10, with step sizes of 2 and 5 dB. The Monte-Carlo  
224 simulations were executed 1000 times in total. All simulations were implemented in MATLAB  
225 R2021a (The MathWorks, Inc., Natick, MA) and Octave 5.2.0.

### 226 ***Behavioral experiments***

227 In this study, we conducted behavioral experiments using a repeated-measures design, where  
228 15 participants completed both pure-tone audiometry and ACALOS tests. We compared the  
229 estimated HTL from the ACALOS and rACALOS methods to the ‘true’ HTL measured by pure-  
230 tone audiometry (i.e., GRaBr and SIUD). To assess the relationship between pure-tone and  
231 ACALOS thresholds, various statistical methods were employed, i.e., correlation coefficients (R),  
232 root mean square error (RMSE), and bias, along with scatter plots to evaluate the performance of  
233 the different ACALOS methods.

### 234 **Statistics**

235 To evaluate the validity of GRaBr and rACALOS relative to standard audiometric and CLS  
236 procedures conducted in a soundproof booth, we utilized Bland-Altman plots following the  
237 approach of Fultz et al. (2020) and Giavarina (2015). Additionally, test-retest reliability for both

238 audiometric procedures was assessed using intraclass correlation coefficients (ICCs) as per Buhl  
239 et al. (2022). Reliability levels were categorized as poor ( $ICC < 0.5$ ), moderate ( $ICC \geq 0.5$ ), good  
240 ( $ICC \geq 0.75$ ), and excellent ( $ICC \geq 0.9$ ). Following Kopun et al. (2022), we further applied mean  
241 interquartile range (MIQR) and mean signed difference (MSD) metrics to evaluate the reliability  
242 of both ACALOS procedures, with lower values indicating greater reliability. Detailed statistical  
243 methods for validity and reliability assessment are provided in Supplementary Materials S1.

## 244 RESULTS

### 245 Noise Level Measurements

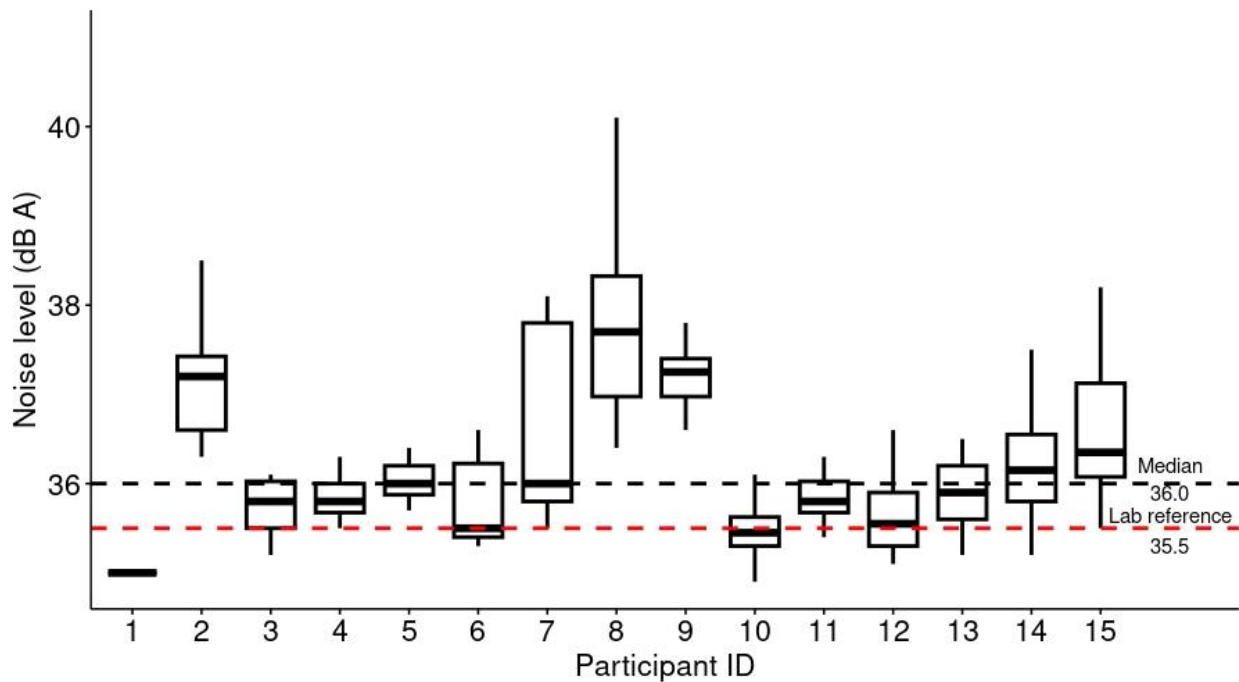

246  
247 Fig. 2. Ambient noise level (in dB A) measurement across participants (N = 15). Medians, 25th  
248 and 75th percentiles, and interquartile ranges (IQR) are visualized in the box-plot while the end  
249 of the whiskers denotes the minimum and maximum, indicating the 5th and 95th percentiles  
250 respectively. Red dashed line: lab reference (i.e., ambient noise level measured within a booth).  
251 Black dashed line: median value across subjects.

252 Fig. 2 presents a box plot of the ambient noise levels recorded by each participant (N = 15),  
253 who documented the noise level a total of 24 times, corresponding to 24 measurement sessions at  
254 home within a week. Notably, the noise levels for all participants remained below the  
255 recommended upper limit of 45 dB A. The median noise level across subjects was 36.0 dB,  
256 which was approximately 0.5 dB higher than the reference noise level measured inside the  
257 sound-attenuated booth. Overall, the sound levels in participants' homes were considerably low  
258 and comparable to those measured within the booth, indicating a suitable test environment. A  
259 few participants (e.g., No. 2 and No. 8) lived near a train station, resulting in slightly elevated  
260 noise levels compared to others. Additionally, one participant (No. 1) misinterpreted the task and  
261 consistently rounded the recorded noise level to an integer, leading to uniform values across  
262 sessions.

263 **Validation Experiment**

264 ***GRaBr***

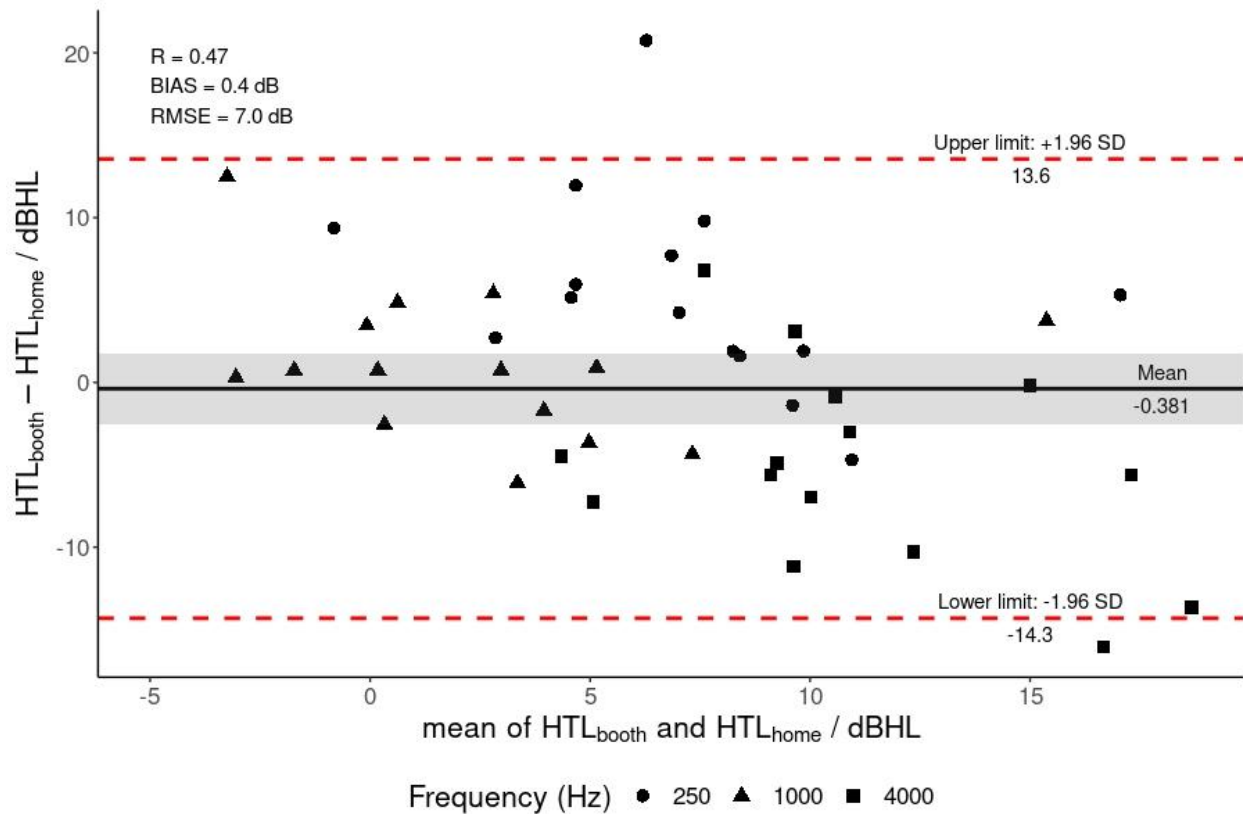

265  
266 Fig. 3. Bland-Altman plot of hearing threshold levels (HTL) in dB HL of frequencies at 0.25, 1,  
267 and 4 kHz (represented with circle, triangle, and rectangle, respectively) measured inside the  
268 booth (i.e., HTL<sub>booth</sub>) using the standard audiometry and at home (i.e., HTL<sub>home</sub>) using the GRaBr  
269 procedure. Red dashed lines: 95% level of agreement; Black solid line: bias between the two  
270 measurement environments; Grey shaded rectangle area: 95% confidence interval of the bias.  
271 The correlation coefficient (R), bias (BIAS), and root mean squared error (RMSE) are provided  
272 in the top-left corner.

273 Fig. 3 compares pure-tone audiometry results obtained in the booth using the standard  
274 audiometry versus testing at home using the GRaBr procedure at frequencies of 0.25, 1, and 4



275 kHz. Most data points fell within the 95% level of agreement, indicating that the at-home and in-  
276 booth measurements did not differ systematically. Furthermore, the 95% confidence interval of  
277 the bias (depicted by the shaded region) encompassed the line of equality, suggesting no  
278 significant bias between the two testing environments. Although the correlation between  
279  $HTL_{\text{booth}}$  and  $HTL_{\text{home}}$  was moderate, both the bias and root mean squared error (RMSE) were  
280 relatively small. Overall, the comprehensive statistical analyses indicated good agreement  
281 between results from both environments, supporting the validity of the smartphone-based remote  
282 method for pure-tone audiometry as an alternative to standard assessments conducted in the  
283 booth, provided that ambient noise levels remain low.

284 A two-way repeated measures ANOVA was conducted to evaluate the effects of frequency  
285 (0.25, 1, and 4 kHz) and test environment (booth versus home) on hearing thresholds. As  
286 anticipated, there was no significant main effect of the test environment ( $p = 0.77$ ); however, the  
287 main effect of frequency was significant ( $p < 0.05$ ). Despite the lack of a significant effect from  
288 the test environment, post-hoc tests comparing HTLs between the home and booth settings  
289 indicated that thresholds measured in the booth did not significantly differ from those measured  
290 at home at 1 kHz, while a significant difference was observed at 0.25 and 4 kHz ( $p < 0.05$ ).

291 Validation results for the SIUD procedure in a home environment, compared to a standard  
292 audiometer, are presented in Figure S1. The SIUD method showed a bias of 0.6 dB, indicating  
293 good validity. Additionally, the SIUD procedure differed significantly from GRaBr in measured  
294 thresholds ( $p < 0.05$ ). Overall, the validity of both adaptive procedures was comparable,  
295 suggesting that both are suitable for remote measurements in home settings.

296 *rACALOS*

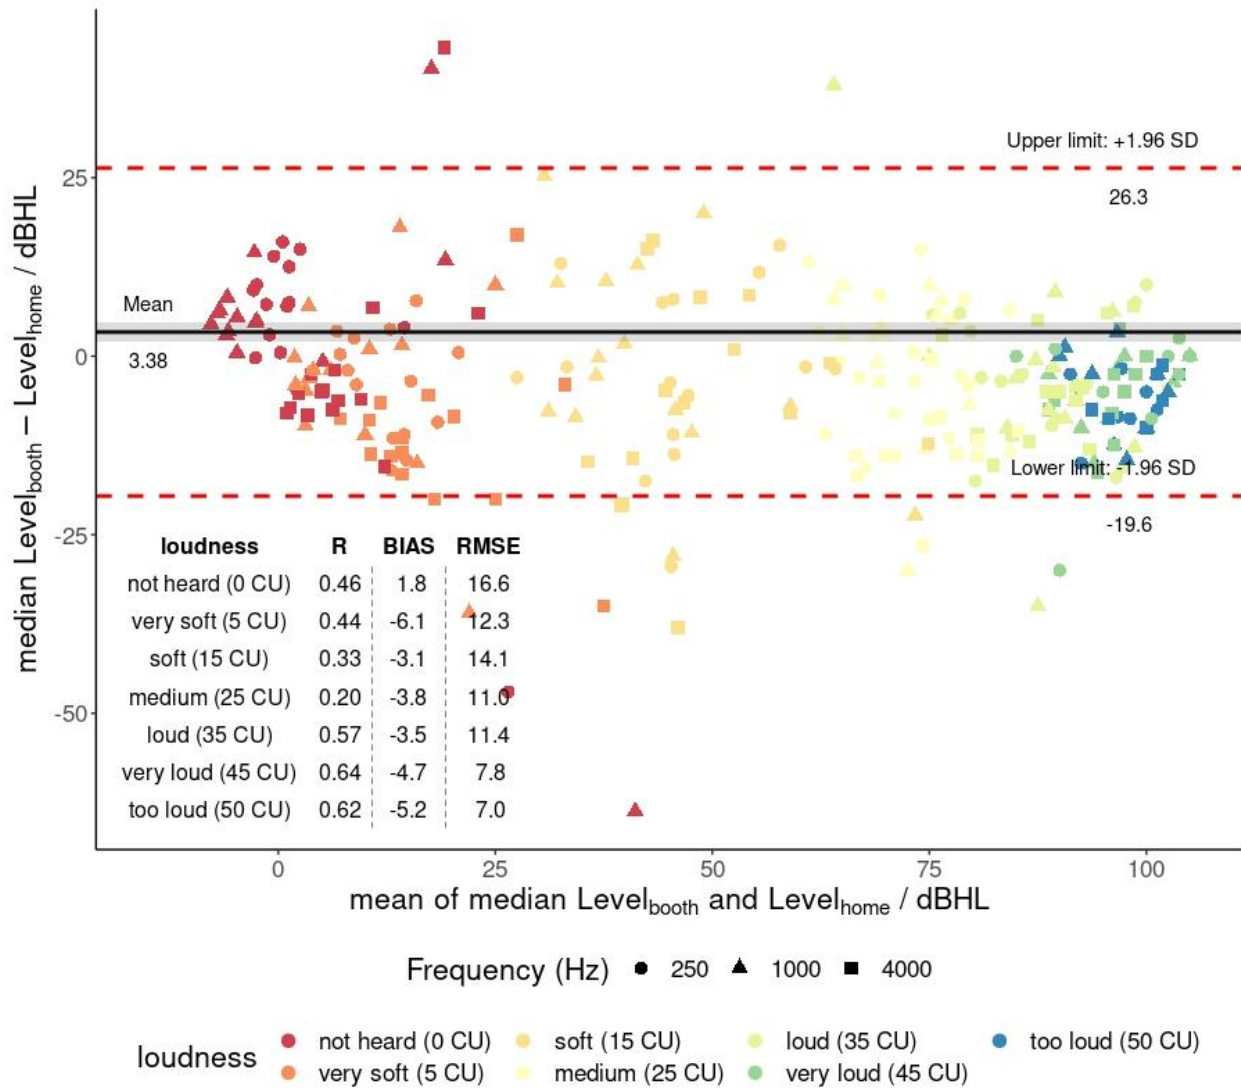

297

298 Fig. 4. Bland-Altman plot of median levels assigned to each CU (denoted with different colors)  
 299 for three frequencies (represented with different shapes) for comparing two test environments,  
 300 i.e., inside the booth using a standard CLS procedure and at home using the rACALOS  
 301 procedure for each participant. A comprehensive set of statistical measures containing R, Bias,  
 302 and RMSE of each CU is provided in the embedded table located at the bottom-left corner. See  
 303 Fig. 3 for an explanation of the Bland-Altman plot and Supplementary Materials S1 for its  
 304 statistical implication.

305 Fig. 4 presents the Bland-Altman plot comparing the median levels of each categorical unit  
306 (CU) measured inside the booth using a standard CLS approach and at home using the  
307 rACALOS approach at frequencies of 0.25, 1, and 4 kHz. The 95% levels of agreement (LOA)  
308 for the upper and lower limits were 26.3 dB and -19.6 dB, respectively. Only a small number of  
309 points fell outside the 95% LOA, indicating that the rACALOS measurements in the booth did  
310 not systematically differ from those obtained remotely. The overall bias between the two  
311 environments across all participants was notably small at 3.38 dB, suggesting that the rACALOS  
312 approach demonstrates good validity compared to the standard CLS approach.

313 The R values for categorical units (CUs) of 35 or higher ranged from 0.57 to 0.62, indicating  
314 a moderate positive correlation. In contrast, CUs of 25 or lower exhibited an R value below 0.45,  
315 suggesting a weak correlation. The biases were generally below 5 dB, and as CU decreased, the  
316 RMSE tended to increase. This phenomenon may be attributed to the relatively high variability  
317 in individual hearing thresholds, resulting in a steeper loudness perception slope at lower levels.  
318 Consequently, this leads to reduced validity at low categorical unit (CU) levels. However, it is  
319 important to note that the slightly elevated background noise levels in the home environment did  
320 not systematically affect this variability, as both positive and negative deviations were observed  
321 between threshold levels estimated at home and those measured in the booth.

322 To examine the effects of three within-subject factors—test environment (booth/home),  
323 frequency (0.25/1/4 kHz), and CU (ranging from 0 to 50 CU in 5 CU increments)—on median  
324 levels corresponding to each CU, a three-way repeated measures ANOVA was conducted. As  
325 expected, the test environment showed no significant main effect, while both frequency and CU  
326 exhibited significant main effects ( $p < 0.05$ ). A post-hoc t-test analyzed the effect of the test  
327 environment across all frequencies and CUs, revealing no significant differences in most of the

328 33 groups of comparison (i.e., 3 levels of frequency \* 11 levels of CU), except for three groups  
329 (measurement at 4 kHz with 5, 25, and 45 CU).

330 The results of the validation experiment comparing the original ACALOS procedure with the  
331 standard CLS procedure are shown in Fig. S2 of the supplementary material, indicating good  
332 validity comparable to that of the rACALOS procedure discussed above. Furthermore, ACALOS  
333 differed significantly from the rACALOS approach ( $p < 0.05$ ), primarily reflecting the higher  
334 sampling and weighting of the loudness data at low levels by rACALOS.

### 335 **Test-Retest Reliability Experiment**

#### 336 ***SIUD and GRaBr***

337 The GRaBr procedure showed test-retest intraclass correlation coefficient (ICC) values  
338 exceeding 0.75 ( $p < 0.05$ ), indicating good reliability across all three frequencies, whereas the  
339 SIUD procedure yielded ICC values ranging from 0.59 to 0.77 ( $p < 0.05$ ), reflecting moderate  
340 test-retest reliability. This difference was significant ( $p < 0.05$ ), i.e., GRaBr demonstrated  
341 significantly higher test-retest reliability than SIUD based on these metrics. Further details on  
342 reliability statistics can be found in Supplementary Document S2 and Table S1.

343 A significant main effect of frequency was observed ( $p < 0.05$ ). Moreover, pairwise t-tests  
344 were performed to assess reliability by comparing the two runs for both adaptive procedures  
345 across all three frequencies, showing no significant differences between runs in most cases,  
346 except for GRaBr at 1 kHz ( $p < 0.05$ ).

#### 347 ***ACALOS and rACALOS***

348 The reliability of the ACALOS and rACALOS procedures was assessed using across-run  
349 bias (quantified by mean signed difference, MSD) and within-run variability (measured by mean  
350 interquartile range, MIQR). Both adaptive procedures demonstrated an MSD of less than 5 dB at

351 all frequencies, indicating a small across-run bias. Most MIQR values did not exceed 10 dB for  
352 either procedure at the three frequencies, although they were typically larger than 10 dB at 5, 10,  
353 and 15 CU, reflecting a consistent within-run variability. Overall, these metrics suggested that  
354 both ACALOS and rACALOS exhibited strong reliability. Please refer to Supplementary  
355 Material S3 and Table S2 for detailed information on the reliability comparison of the ACALOS  
356 and rACALOS procedures.

357 A repeated measures ANOVA revealed a significant main effect of the procedure, indicating  
358 a statistically significant difference between ACALOS and rACALOS ( $p < 0.05$ ). Since the  
359 rACALOS and ACALOS procedures are identical in Phases I and II, this difference is likely  
360 attributable to the additional trials included in Phase III of the rACALOS procedure (see Fig. 1).

361 No significant effect was found for frequency, and as expected, the two runs (test and retest  
362 measurements) did not differ. A subsequent post-hoc t-test compared median levels of the  
363 ACALOS and rACALOS procedures between runs 1 and 2 across three frequencies and 11  
364 categories, indicating that median levels for run 1 did not significantly differ from those for run 2  
365 in most cases (31 out of 33 groups of comparison = 3 levels of frequency \* 11 levels of CU),  
366 except for two groups (measurements at 0.25 kHz for 25 and 40 CUs).



379 Computer simulations (N = 1000 runs) of thresholds estimated from the ACALOS and  
380 rACALOS methods under various parameter combinations are presented in Fig. 5. The medians  
381 from the rACALOS method were closer to the target threshold compared to ACALOS, and the  
382 interquartile ranges (IQRs) for rACALOS were significantly smaller than those for ACALOS, as  
383 indicated by F-tests ( $p < 0.05$ ). This indicates that rACALOS provides a more accurate  
384 estimation of the hearing threshold level (HTL) than the original method. Additionally,  
385 increasing the number of trials resulted in a decrease in IQR, suggesting that the precision of  
386 both methods can be enhanced by increasing the number of trials even though more  
387 measurement time is required. Furthermore, methods utilizing a smaller step size exhibited  
388 significantly narrower IQRs compared to those with a larger step size, as suggested by F-tests ( $p$   
389  $< 0.05$ ).

390 A two-way ANOVA was conducted to evaluate the effects of the number of trials (10, 20,  
391 and 30) and step size (2 and 5 dB) on the simulated thresholds. The analysis indicated that both  
392 factors significantly impacted the simulated thresholds ( $p < 0.05$ ). Subsequently, a pair-wise t-  
393 test was performed to compare the simulated hearing thresholds of ACALOS (set as the  
394 reference) and rACALOS, with p-values adjusted using the Bonferroni method. The results  
395 revealed a significant difference in simulated thresholds between ACALOS and rACALOS  
396 across all parameter sets ( $p < 0.05$ ) After carefully balancing high accuracy and relatively fast  
397 convergence, a step size of 5 dB was selected, and the number of trials was set to 10 for the  
398 remainder of this study.

399 *Behavioral experiments*

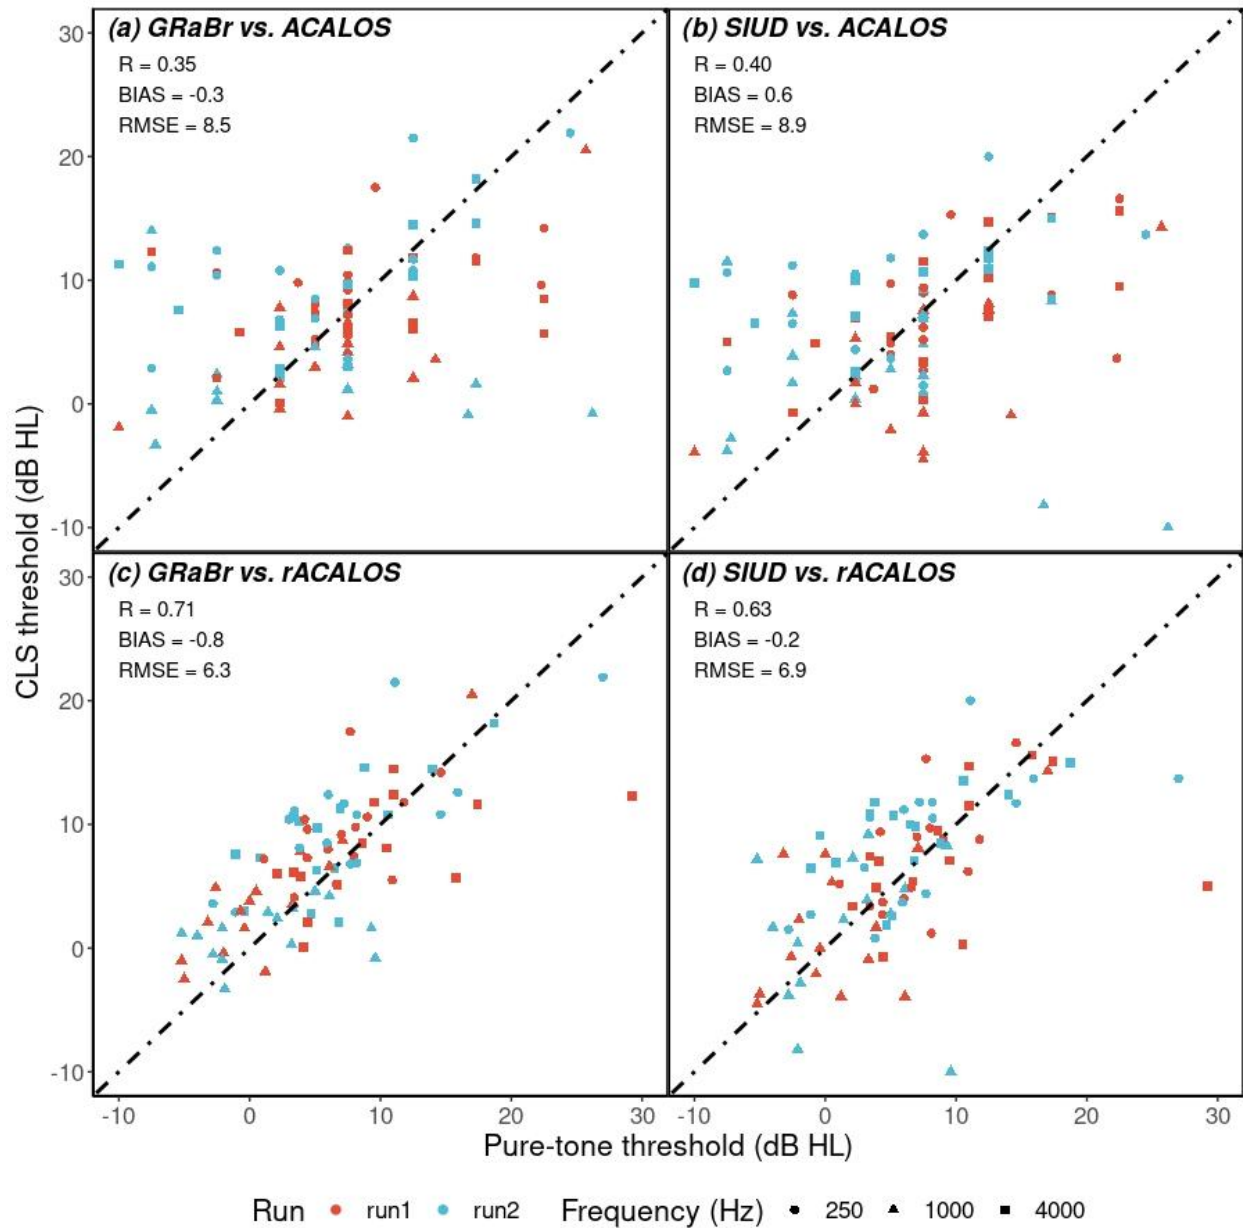

400

401 Fig. 6. Scatter plot for comparison between pure-tone (abscissa) and CLS (ordinate) thresholds in  
402 dB HL of  $N = 15$  individual listeners. Frequency is labeled with different shapes while the run is  
403 denoted with different colors (run1: red, run2: blue). A set of statistical metrics ( $R$ , Bias, and  
404 RMSE) are reported in the top-left corner. For rACALOS, 10 additional trials with a step size of  
405 5 dB were used.



406 Pure-tone audiometric thresholds are plotted against CLS thresholds for two runs and three  
407 frequencies in Fig. 6. Compared to ACALOS, the majority of rACALOS points were  
408 consistently and closely clustered around the diagonal line, indicating that thresholds estimated  
409 by the rACALOS method aligned more closely with pure-tone thresholds than those from  
410 baseline ACALOS and, hence, provide improved accuracy in threshold estimation.  
411 Quantitatively, R values increased by 36% for GRaBr and 23% for SIUD when ACALOS was  
412 reinforced near the hearing threshold level. Additionally, RMSE values for the rACALOS  
413 method decreased by approximately 2 dB compared to the baseline, while biases remained  
414 unchanged. Overall, the reinforcement of baseline ACALOS positively influenced cross-  
415 correlation and reduced error.

416 The highest correlation coefficient and lowest RMSE were observed between GRaBr  
417 thresholds and rACALOS, followed by SIUD and ACALOS. In contrast, the unmodified  
418 ACALOS procedure showed lower correlation coefficients and higher RMSEs for both threshold  
419 estimation methods, indicating the superior performance of rACALOS, as confirmed by t-tests ( $p$   
420  $< 0.05$ ).

## 421 **DISCUSSION**

### 422 **Noise Level Measurements**

423 The median ambient noise level across participants' homes was 36.0 dB A, which is  
424 generally comparable to the reference noise level in a soundproof booth. As expected, the  
425 measurement results from the home environment aligned well with those obtained inside the  
426 booth. Additionally, our findings comply with the American National Standards Institute (ANSI)  
427 S3.1–1999 (R2018) standard for maximum permissible ambient noise levels (MPANL) for  
428 supra-aural and insert earphones with covered ears, although they exceed the MPANL

429 recommendation for uncovered ears, as established for audiogram measurements. Furthermore,  
430 our measured noise levels did not surpass the updated MPANL, which was extended by Margolis  
431 et al. (2022) for three types of circumaural earphones. Overall, these results demonstrate why our  
432 listening tests conducted in a home environment can achieve accuracy comparable to those  
433 performed inside a booth.

434 Our measured ambient noise levels are lower than those reported in most earlier studies (e.g.,  
435 40 dB A by Storey et al. (2014), 46 dB A in a non-outpatient clinic by Brennan-Jones et al.  
436 (2016), and between 33.7 and 46.3 dB SPL in a ‘natural’ environment by Swanepoel et al. (2015))  
437 that aimed to control ambient noise during audiometric tests. However, our levels are higher than  
438 those in a few studies, such as 34.6 dB A in a non-sound-treated clinical room by Serpanos et al.  
439 (2022) and 35 dB A in exam rooms by Bean et al. (2022). It is likely that our participants  
440 conducted the smartphone-based listening tests at home in rural areas during the morning or  
441 evening, whereas other studies typically test in clinical settings located in urban areas during the  
442 daytime, which tend to be noisier. Consequently, our overall measurement environments  
443 contained less ambient noise.

444 In addition to meeting the MPANL for pure-tone audiometry, our study adheres to the  
445 MPANL of 50 dB A specified for the ACALOS test outside a sound-treated booth, as suggested  
446 by Kopun et al. (2022). Therefore, we expect that our measured ACALOS results in a home  
447 environment will be comparable to those obtained inside a booth (see the discussion of the  
448 validation study for ACALOS below).

#### 449 **Pure-Tone Audiometry**

450 Pure-tone audiometry conducted outside the booth on a smartphone in a quiet environment is  
451 generally valid and reliable when compared to in-booth measurements. While SIUD

452 demonstrates moderate reliability, GRaBr shows good reliability (the ICC values are greater than  
453 0.75 ( $p < 0.05$ )) for remote smartphone-based assessments, making GRaBr the significantly more  
454 reliable option ( $p < 0.05$ ), as expected from the simulations reported by Xu et al. (2024a). Our  
455 findings align with recent studies examining the validity of boothless pure-tone audiometry  
456 (MacLennan-Smith et al., 2013; Storey et al., 2014; Swanepoel et al., 2015; Brennan-Jones et al.,  
457 2016; Serpanos et al., 2022). The bias between in-booth and at-home measurements is 0.4 dB,  
458 which falls within the empirical ranges reported by MacLennan-Smith et al. (2013) (-0.6 to 1.1  
459 dB) and Swanepoel et al. (2015) (-2.0 to 1.5 dB). However, the correlation coefficient R (0.47)  
460 in our study is notably lower than that reported by MacLennan-Smith et al. (2013), where R  
461 exceeded 0.92 for both ears at frequencies between 0.25 and 8 kHz. This discrepancy may be  
462 attributed to the much smaller range of thresholds across our participants: our study included 15  
463 young adults with normal hearing, whereas MacLennan-Smith et al. (2013) had a larger sample of  
464 147 elderly participants with hearing impairments, 59% of whom exhibited a pure-tone average  
465 (PTA) greater than 25 dB. As Swanepoel et al. (2010) noted, hearing-impaired listeners typically  
466 show higher correlation coefficients than those with normal hearing due to reduced sensitivity  
467 and lesser impact from ambient noise. However, our test sample with young, normal hearing  
468 listeners puts a higher demand on the quietness of the acoustic environment and the reliability of  
469 the test procedure.

470 The test-retest reliability aligns well with findings from previous studies, such as those by  
471 Swanepoel et al. (2015) and Hazan et al. (2022). The bias ( $N = 11$ ) between test and retest  
472 measurements was 1.8, 0.0, and 1.4 dB at 0.25, 1, and 4 kHz, respectively, consistent with the  
473 findings of Swanepoel et al. (2015), where the bias also remained below 2 dB. The correlation  
474 coefficient R at 1 kHz aligns with Hazan et al. (2022), although it is smaller at 4 kHz. Hazan et al.

475 (2022) suggested that test-retest performance improves with poorer hearing; since our study  
476 focused on young normal-hearing (NH) listeners with better hearing abilities, it is plausible that  
477 this contributed to the lower R-value observed at 4 kHz. Additionally, while Hazan et al. (2022)  
478 automatically rejected hearing thresholds when the ambient noise level at certain frequencies  
479 exceeded the stimulus level, we did not filter out such outliers.

480 The threshold offset between GRaBr and SIUD was approximately 1 dB, with GRaBr  
481 demonstrating a smaller standard deviation of thresholds. This trend mirrors findings from a  
482 simulation study, suggesting that the theoretical framework established by Xu et al. (2024a)  
483 accurately predicts outcomes in behavioral experiments. Since GRaBr presents more trials near  
484 the threshold level compared to SIUD, it is reasonable to conclude that the uncertainty, as  
485 indicated by the standard deviation, is significantly lower for GRaBr than for SIUD ( $p < 0.05$ ).  
486 This confirms the preference for GRaBr over SIUD for smartphone usage, attributed to its  
487 superior performance as highlighted in the simulation study.

#### 488 **Adaptive Categorical Loudness Scaling**

489 Remote adaptive categorical loudness scaling (ACALOS) and its reinforced version  
490 (rACALOS) conducted at home demonstrated strong validity and test-retest reliability. Our  
491 findings align with the validation study by Kopun et al. (2022) and reliability studies by  
492 Rasetshwane et al. (2015), Fultz et al. (2020), and Kopun et al. (2022). The systematic bias of 3.4  
493 dB between in-booth and at-home measurements in our study is notably lower than the 5.4 dB  
494 reported by Kopun et al. (2022), suggesting improved accuracy in our results. One possible  
495 explanation could be the difference in environmental noise, as the average ambient noise level  
496 reported by Kopun et al. (2022) was approximately 10 dB higher than in our study, likely  
497 contributing to the larger bias in their measurements. Furthermore, differences in methodology

498 may also explain the discrepancy; while Kopun et al. (2022) applied the standard ISO 3682  
499 method, we employed an optimized procedure based on Oetting et al. (2014), which may have  
500 enhanced the precision of our measurements.

501 Both ACALOS methods demonstrated high test-retest reliability, quantified by mean IQR  
502 (within-run variability) and MSD (across-run bias). At 1 kHz, the mean IQR as a function of CU  
503 for both ACALOS methods was generally consistent with the data from Rasetshwane et al. (2015)  
504 and Kopun et al. (2022). Specifically, the mean IQR at 5 CU for rACALOS closely matched that  
505 of Kopun et al. (2022) and was smaller than that reported by Rasetshwane et al. (2015),  
506 suggesting good stability near the hearing threshold. Additionally, at 4 kHz, the mean IQR at 5  
507 CU for rACALOS was smaller than in both empirical studies, likely due to the reinforcement at  
508 the HTL. Overall, rACALOS exhibited the least variability at the threshold level compared to  
509 baseline ACALOS, as well as the results reported in these two studies, indicating its superior  
510 performance in reducing the variability at the threshold.

511 Regarding across-run bias at 1 and 4 kHz, similar to the findings of Rasetshwane et al. (2015),  
512 the mean signed differences (MSD) of both ACALOS methods in our study were approximately  
513 2-3 dB smaller than those reported by Kopun et al. (2022). This can be attributed to our stricter  
514 requirements for the acoustic conditions, including a lower maximum permissible ambient noise  
515 level, which likely reduced ambient noise interference and resulted in smaller across-run bias.  
516 While the ACALOS method showed a smaller MSD at 4 kHz, it had a larger MSD at 1 kHz  
517 compared to rACALOS. Fultz et al. (2020) evaluated the reliability of four different CLS  
518 methods—(1) fixed-level procedure (FL), (2) slope-adaptive procedure (SA), (3) maximum  
519 expected information-median (MEI-Med), and (4) maximum expected information-maximum  
520 likelihood (MEI-ML). The bias in Fultz et al.'s study across these methods at both frequencies

521 was larger than ours. A potential reason for this discrepancy could be the inherent limitations of  
522 the newly developed CLS methods, as Fultz et al. (2020) noted that the adaptive track of the MEI  
523 method was suboptimal due to listener variability represented in the multi-category psychometric  
524 function. With the addition of more trials, particularly those near the threshold, our method is  
525 expected to yield less variability in threshold estimates compared to other approaches, thereby  
526 reducing bias.

### 527 **Accuracy of HTL Estimation**

528 Computer simulations indicate that rACALOS provides more precise estimates of hearing  
529 thresholds compared to the baseline ACALOS, largely due to the increased number of stimuli  
530 presented near the threshold level (see Fig. 1). One limitation of the original ACALOS is its  
531 potential failure to provide a low variability of the estimated hearing threshold level (HTL), as  
532 highlighted by Oetting et al. (2014), most likely due to evenly distributing the fit error across the  
533 whole dynamic range. This is mitigated in rACALOS by reinforcing responses in the HTL  
534 region. Additionally, increasing the number of trials (N) and using a smaller step size can reduce  
535 error and enhance measurement accuracy, although this comes at the cost of reduced efficiency  
536 (e.g., Kollmeier et al., 1988). These findings align with earlier studies, such as Lecluyse et al.  
537 (2009), which support the trade-off between precision and efficiency.

538 Table 1 presents a comparison between our current study and several state-of-the-art works  
539 (Fultz et al., 2020; Trevino et al., 2016; Sanchez-Lopez et al., 2021) by evaluating the cross-  
540 correlation between CLS and pure-tone thresholds. Multiple CLS methods, including FL, MEL-  
541 Med, MEL-ML, SA, ACALOS, and rACALOS, were used to estimate thresholds, which were  
542 then compared with pure-tone thresholds measured using various audiometric methods such as a  
543 clinical audiometer, SIUD, and GRaBr. In the studies by Fultz et al. (2020) and Trevino et al.

544 (2016), R values ranged from 0.21 to 0.26 for all four CLS methods, indicating a relatively weak  
545 cross-correlation. Additionally, the RMSEs and biases in these studies were notably large,  
546 suggesting that CLS thresholds did not align well with pure-tone thresholds. In contrast,  
547 Sanchez-Lopez et al. (2021) applied a baseline ACALOS method using the same audiometric  
548 procedure as Fultz et al. (2020), and while the R-value did not significantly improve, both RMSE  
549 and bias were notably reduced. In our study, we employed SIUD and GRaBr to measure pure-  
550 tone thresholds, yielding a stronger cross-correlation and smaller bias, although the RMSE was  
551 slightly larger or comparable to that reported by Sanchez-Lopez et al. (2021).

552       Considering all the studies, the rACALOS method consistently produces thresholds closest to  
553 pure-tone thresholds, outperforming other ACALOS methods. However, it is important to note  
554 that rACALOS requires more measurement time due to the increased number of trials focused on  
555 converging near the HTL. Additionally, using precise audiometry methods such as SIUD and  
556 GRaBr may yield stronger correlations with CLS thresholds, despite the fact that many studies  
557 still regard pure-tone thresholds obtained via clinical audiometers as the ‘gold standard’. It is  
558 also crucial to recognize that this comparison is based on a small sample of young NH listeners,  
559 and the conclusions may differ if HI listeners are included or if a larger participant pool is  
560 studied. This consideration is particularly relevant for potential discrepancies between the  
561 narrowband noise thresholds estimated by the CLS methods used here and the pulsed pure-tone  
562 thresholds assessed via audiograms. While threshold differences in our study sample of young  
563 NH listeners were minimal, variations in stimulus characteristics—such as spectral extent and  
564 modulation spectrum—may yield threshold differences in naïve listeners with hearing  
565 impairments. Nonetheless, these differences are expected to be minimal, as the low-noise, third-

566 octave-band noise utilized here is effectively equivalent to a frequency-modulated sinusoid with  
 567 minor envelope fluctuations and an instantaneous frequency confined well within a critical band.

568 Table 1. Comparison including ours and several state-of-the-art studies between various  
 569 pure-tone audiometry methods and CLS methods in terms of threshold level employing a set of  
 570 statistical measures (R, RMSE, and Bias). N = number of participants. The largest R, the  
 571 smallest RMSE, and bias between different combinations of audiometric and CLS methods are  
 572 highlighted in bold.

|                                              | Audiometric method | CLS method | N  | R           | RMSE       | Bias        |
|----------------------------------------------|--------------------|------------|----|-------------|------------|-------------|
| Fultz et al. 2020;<br>Trevino et al.<br>2016 | Audiometer         | FL         | 17 | 0.21        | 12.2       | -6.9        |
|                                              |                    | MEL-Med    |    | 0.26        | 25.3       | -18.0       |
|                                              |                    | MEL-ML     |    | 0.26        | 15.5       | -10.6       |
|                                              |                    | SA         |    | 0.21        | 15.7       | -8.4        |
| Sanchez-Lopez<br>et al. 2021                 | Audiometer         | ACALOS     | 11 | 0.24        | 7.1        | -2.3        |
| current                                      | SIUD               | ACALOS     | 15 | 0.44        | 9.4        | 1.5         |
|                                              | GRaBr              |            |    | 0.38        | 9.0        | 1.0         |
|                                              | SIUD               | rACALOS    |    | 0.59        | 7.8        | 0.5         |
|                                              | GRaBr              |            |    | <b>0.71</b> | <b>6.9</b> | <b>0.04</b> |

573

### 574 **Advantages of rACALOS**

575 **Increased time efficiency:** The rACALOS procedure combines two listening tests—pure-  
 576 tone audiometry and ACALOS—into a single, integrated protocol. This approach significantly  
 577 reduces the measurement time required for participants by eliminating the need for separate tests.

578 **Improved HTL accuracy:** Compared to the original ACALOS, rACALOS includes  
 579 additional trials near the hearing threshold level (HTL), enhancing the precision of HTL



580 estimation (see Table 1 for details). These modifications enable the seamless integration of  
581 audiometric measurement into the ACALOS framework.

582 **Consistent user interface and no additional training requirements:** The rACALOS  
583 procedure uses the same interface as ACALOS, so participants familiarized with ACALOS  
584 require no extra training to complete the new protocol.

### 585 **Limitations and Outlook**

586 In this study, we conducted smartphone-based listening tests outside of a sound booth,  
587 preceded by ambient noise level measurements. Given that most tests occurred in rather quiet  
588 acoustical conditions (i.e., little environmental noise pollution), the testing environment  
589 generally exhibited a low background noise level. However, many individuals live in urban  
590 regions with significant vehicle or industrial noise, where real-world environments are typically  
591 much noisier. Testing in such noisy conditions warrants further investigation. Potential solutions,  
592 such as circumaural muffs or noise-canceling earphones (NCE), could prove effective. For  
593 instance, Saliba et al. (2017) evaluated mobile-based audiometry under 50 dB A background  
594 noise, using passive and active noise cancellation by placing circumaural muffs over insert  
595 headphones, successfully reducing noise. Similarly, Clark et al. (2017) tested NCE  
596 (BoseQuietComfort 15) in a patient consultation room and found that NCE sufficiently  
597 attenuated ambient noise below the ANSI standards.

598 A key concern for out-of-booth audiometric tests is distraction. As noted by Margolis et al.  
599 (2022), background noise not only causes direct masking but also acts as a source of distraction.  
600 Their study demonstrated that increasing background noise levels led to elevated hearing  
601 thresholds and higher subjective ratings of distraction. Xu et al. (2024a) further supported these  
602 findings, characterizing distraction from internal noise (e.g., background noise) as long-term

603 inattention. They also proposed and simulated short-term inattention—where listeners are  
604 distracted by external events—during mobile hearing tests, though this has yet to be validated  
605 with human participants.

606 Another limitation of this study is the use of an integrated microphone for noise measurement.  
607 Studies like Kopun et al. (2022) recommend using an external microphone, such as the MicW  
608 iBoundary, which provides higher accuracy in capturing frequency characteristics and calibration  
609 precision compared to the internal microphone used here. Enhanced calibration of smartphone  
610 microphones could be achieved with an external reference sound, such as a whistle tone  
611 produced by a standard empty beer bottle (Scharf et al., 2024). However, achieving more  
612 accurate calibration and a detailed assessment of ambient noise spectra is beyond the scope of  
613 this proof-of-concept study, which involved a limited sample size. Future research will expand  
614 the sample size and include participants with sensorineural hearing loss for comparison.

615 Finally, Shen et al. (2018) and Kursun et al. (2023) introduced a quick categorical loudness  
616 scaling (qCLS) procedure based on a Bayesian adaptive method, which can estimate equal  
617 loudness contours within just 5 minutes. Given its efficiency and accuracy, incorporating qCLS  
618 into future smartphone-based loudness tests is worth considering. However, it remains uncertain  
619 whether qCLS can estimate hearing thresholds as precisely as the rACALOS developed in this  
620 study, highlighting the need for further research to evaluate its threshold accuracy in comparison.

## 621 **CONCLUSION**

622 This proof-of-concept study demonstrates that smartphone-based hearing tests—specifically  
623 pure-tone audiometry and categorical loudness scaling—can be effectively conducted remotely  
624 in participants’ homes, provided that background noise levels are sufficiently low (e.g., below  
625 the MPANLs standard). The key findings from our experiments can be summarized as follows:

626       **Validation Experiment:** Our results indicate that air-conduction pure-tone audiometry and  
627 categorical loudness scaling yield equivalent outcomes in two test environments (i.e., at home  
628 and inside a sound-attenuated booth) at frequencies of 0.25, 1, and 4 kHz, suggesting satisfactory  
629 validity.

630       **Test-Retest Reliability Experiment:** Despite background noise levels reaching up to 45 dB  
631 A in a home environment, both audiometric tests exhibited moderate-to-good test-retest  
632 reliability, with the reliability at 1 kHz being higher than at the other two frequencies.

633       **Performance of GRaBr:** GRaBr demonstrated greater reliability than SIUD across all three  
634 frequencies, evidenced by a higher (intraclass) correlation and a lower RMSE value.  
635 Consequently, GRaBr is preferred for mobile audiometry outside of the booth due to its  
636 enhanced reliability.

637       **Performance of rACALOS:** Both computer simulations and human experiments confirm  
638 that thresholds estimated by rACALOS are closer to those measured using standard audiometric  
639 procedures compared to baseline ACALOS, indicating that the rACALOS method improves  
640 HTL estimation. In real-world environments, this reinforcement strategy may be particularly  
641 beneficial, as low SPL test stimuli are more susceptible to interference from background noise.  
642 In addition, the rACALOS method can integrate threshold measurement with the ACALOS test,  
643 resulting in greater efficiency compared to conducting the two tests separately. Therefore, the  
644 rACALOS approach holds promise for efficient remote assessments using mobile devices in the  
645 future.

## 646 **GLOSSARY**

---

| Abbreviation | Meaning                               |
|--------------|---------------------------------------|
| ACALOS       | adaptive categorical loudness scaling |

---

|         |                                                              |
|---------|--------------------------------------------------------------|
| ANOVA   | analysis of variance                                         |
| B&K     | Brüel&Kjaer                                                  |
| BTUX    | fitting method for loudness function in ACALOS               |
| CLS     | categorical loudness scaling                                 |
| CU      | categorical units                                            |
| FL      | fixed-level procedure                                        |
| GRaBr   | graded response bracketing                                   |
| HI      | hearing impaired                                             |
| HTL     | hearing threshold level (at 2.5 CU on the loudness function) |
| ICC     | intraclass cross-correlation                                 |
| IQR     | interquartile ranges                                         |
| LOA     | level of agreement                                           |
| MEL-Med | maximum expected information-maximum likelihood              |
| MEL-ML  | maximum expected information-median                          |
| MIQR    | mean interquartile range                                     |
| MPANLs  | maximum permissible ambient noise levels                     |
| MSD     | mean signed difference                                       |
| NCE     | noise reduction earphones                                    |
| NH      | normal hearing                                               |
| PTA     | pure-tone average                                            |
| qCLS    | quick categorical loudness scaling                           |
| rACALOS | reinforced adaptive categorical loudness scaling             |
| RMSE    | root mean squared error                                      |
| SA      | slope-adaptive procedure                                     |
| SIUD    | single interval up and down                                  |
| SPL     | sound pressure level                                         |

647

648 **REFERENCES (BIBLIOGRAPHIC)**

649

- 650 Akeroyd, M. A., Arlinger, S., Bentler, R. A., Boothroyd, A., Dillier, N., Dreschler, W. A., ... &  
651 Kollmeier, B. (2015). International Collegium of Rehabilitative Audiology (ICRA)  
652 recommendations for the construction of multilingual speech tests: ICRA Working Group  
653 on Multilingual Speech Tests. *International journal of audiology*, 54(sup2), 17-22.
- 654 Almufarrij, I., Dillon, H., Dawes, P., Moore, D. R., Yeung, W., Charalambous, A. P., ... &  
655 Munro, K. J. (2022). Web-and app-based tools for remote hearing assessment: a scoping  
656 review. *International Journal of Audiology*, 1-14.
- 657 American National Standards Institute. Maximum Permissible Ambient Noise Levels for  
658 Audiometric Test Rooms. (ANSI S3.1–R2018). New York, NY: American National  
659 Standards Institute; 2018
- 660 Bean, B. N., Roberts, R. A., Picou, E. M., Angley, G. P., & Edwards, A. J. (2022). Automated  
661 audiometry in quiet and simulated exam room noise for listeners with normal hearing and  
662 impaired hearing. *Journal of the American Academy of Audiology*, 33(01), 006-013.
- 663 Behar, A. (2021). Audiometric tests without booths. *International Journal of Environmental  
664 Research and Public Health*, 18(6), 3073.
- 665 Bianco, R., Mills, G., de Kerangal, M., Rosen, S., & Chait, M. (2021). Reward enhances online  
666 participants' engagement with a demanding auditory task. *Trends in Hearing*, 25,  
667 23312165211025941.
- 668 Brand, T., & Hohmann, V. (2002). An adaptive procedure for categorical loudness scaling. *The  
669 Journal of the Acoustical Society of America*, 112(4), 1597-1604.
- 670 Brand, T., 2000. Analysis and Optimization of Psychophysical Procedures in Audi-ology.  
671 Universität Oldenburg, Germany. PhD thesis.

- 672 Brennan-Jones, C. G., Eikelboom, R. H., Swanepoel, D. W., Friedland, P. L., & Atlas, M. D.  
673 (2016). Clinical validation of automated audiometry with continuous noise-monitoring in  
674 a clinically heterogeneous population outside a sound-treated environment. *International*  
675 *journal of audiology*, 55(9), 507-513.
- 676 Buhl, M., Akin, G., Saak, S., Eysholdt, U., Radeloff, A., Kollmeier, B., & Hildebrandt, A. (2022).  
677 Expert validation of prediction models for a clinical decision-support system in audiology.  
678 *Frontiers in Neurology*, 13, 960012.
- 679 Clark, J. G., Brady, M., Earl, B. R., Scheifele, P. M., Snyder, L., & Clark, S. D. (2017). Use of  
680 noise cancellation earphones in out-of-booth audiometric evaluations. *International*  
681 *Journal of Audiology*, 56(12), 989-996.
- 682 Fultz, S. E., Neely, S. T., Kopun, J. G., & Rasetshwane, D. M. (2020). Maximum expected  
683 information approach for improving efficiency of categorical loudness scaling. *Frontiers*  
684 *in Psychology*, 11, 578352.
- 685 Giavarina, D. (2015). Understanding bland altman analysis. *Biochemia medica*, 25(2), 141-151.
- 686 Hazan, A., Luberadzka, J., Rivilla, J., Snik, A., Albers, B., Méndez, N., ... & Kinsbergen, J.  
687 (2022). Home-Based Audiometry With a Smartphone App: Reliable Results?. *American*  
688 *Journal of Audiology*, 31(3S), 914-922.
- 689 ISO 16832, 2006. Acousticsd Loudness Scaling by Means of Categories. Standard of the  
690 International Organization for Standardization, Geneva, Switzerland.
- 691 Kohlrausch, A., Fassel, R., Van Der Heijden, M., Kortekaas, R., Van De Par, S., Oxenham, A. J.,  
692 & Püschel, D. (1997). Detection of tones in low-noise noise: Further evidence for the role  
693 of envelope fluctuations. *Acta Acustica united with Acustica*, 83(4), 659-669.

- 694 Kollmeier, B., Gilkey, R. H., & Sieben, U. K. (1988). Adaptive staircase techniques in  
695 psychoacoustics: A comparison of human data and a mathematical model. *The Journal of*  
696 *the Acoustical Society of America*, 83(5), 1852-1862.
- 697 Koo, T. K., & Li, M. Y. (2016). A guideline of selecting and reporting intraclass correlation  
698 coefficients for reliability research. *Journal of chiropractic medicine*, 15(2), 155-163.
- 699 Kopun, J. G., Turner, M., Harris, S. E., Kamerer, A. M., Neely, S. T., & Rasetshwane, D. M.  
700 (2022). Evaluation of Remote Categorical Loudness Scaling. *American journal of*  
701 *audiology*, 31(1), 45-56.
- 702 Kursun, Bertan & Petersen, Erik & Shen, Yi. (2023). Exploring Self-directed Hearing-aid Fitting  
703 with No Booth And No Audiogram. 10.13140/RG.2.2.19575.19360.
- 704 Lecluyse, W., & Meddis, R. (2009). A simple single-interval adaptive procedure for estimating  
705 thresholds in normal and impaired listeners. *The Journal of the Acoustical Society of*  
706 *America*, 126(5), 2570-2579.
- 707 MacLennan-Smith, F., Swanepoel, D. W., & Hall III, J. W. (2013). Validity of diagnostic pure-  
708 tone audiometry without a sound-treated environment in older adults. *International*  
709 *journal of audiology*, 52(2), 66-73.
- 710 Margolis, R. H., Saly, G. L., & Wilson, R. H. (2022). Ambient Noise Monitoring during Pure-  
711 Tone Audiometry. *Journal of the American Academy of Audiology*, 33(01), 045-056.
- 712 Meinke, D. K., & Martin, W. H. (2023). Boothless audiometry: Ambient noise considerations.  
713 *The Journal of the Acoustical Society of America*, 153(1), 26-39.
- 714 Min, S. H., & Zhou, J. (2021). Smplot: An R package for easy and elegant data visualization.  
715 *Frontiers in Genetics*, 12, 2582.

- 716 Oetting, D., Brand, T., & Ewert, S. D. (2014). Optimized loudness-function estimation for  
717 categorical loudness scaling data. *Hearing Research*, 316, 16-27.
- 718 Ooster, J., Krueger, M., Bach, J. H., Wagener, K. C., Kollmeier, B., & Meyer, B. T. (2020).  
719 Speech audiometry at home: automated listening tests via smart speakers with normal-  
720 hearing and hearing-impaired listeners. *Trends in Hearing*, 24, 2331216520970011.
- 721 Peng, Z. E., Waz, S., Buss, E., Shen, Y., Richards, V., Bharadwaj, H., ... & Venezia, J. H. (2022).  
722 Remote testing for psychological and physiological acoustics. *The Journal of the*  
723 *Acoustical Society of America*, 151(5), 3116-3128.
- 724 Rasetshwane, D. M., Trevino, A. C., Gombert, J. N., Liebig-Trehearn, L., Kopun, J. G., Jesteadt,  
725 W., ... & Gorga, M. P. (2015). Categorical loudness scaling and equal-loudness contours  
726 in listeners with normal hearing and hearing loss. *The Journal of the Acoustical Society*  
727 *of America*, 137(4), 1899-1913.
- 728 Revelle, W. (2018). *psych: Procedures for psychological, psychometric, and personality research*.
- 729 Robler, S. K., Coco, L., & Krumm, M. (2022). Telehealth solutions for assessing auditory  
730 outcomes related to noise and ototoxic exposures in clinic and research. *The Journal of*  
731 *the Acoustical Society of America*, 152(3), 1737-1754.
- 732 Saliba, J., Al-Reefi, M., Carriere, J. S., Verma, N., Provencal, C., & Rappaport, J. M. (2017).  
733 Accuracy of mobile-based audiometry in the evaluation of hearing loss in quiet and noisy  
734 environments. *Otolaryngology–Head and Neck Surgery*, 156(4), 706-711.
- 735 Sanchez-Lopez, R., Nielsen, S. G., El-Haj-Ali, M., Bianchi, F., Fereczkowski, M., Cañete, O.  
736 M., ... & Santurette, S. (2021). Auditory tests for characterizing hearing deficits in  
737 listeners with various hearing abilities: The BEAR test battery. *Frontiers in neuroscience*,  
738 15, 724007.



- 739 Scharf, M. K., Huber, R., Schulte, M., & Kollmeier, B. (2024). Microphone calibration  
740 estimation for mobile audiological tests with resonating bottles. *International Journal of*  
741 *Audiology*, 1-7.
- 742 Serpanos, Y. C., Hobbs, M., Nunez, K., Gambino, L., & Butler, J. (2022). Adapting audiology  
743 procedures during the pandemic: Validity and efficacy of testing outside a sound booth.  
744 *American Journal of Audiology*, 31(1), 91-100.
- 745 Shen, Y., Zhang, C., & Zhang, Z. (2018). Feasibility of interleaved Bayesian adaptive procedures  
746 in estimating the equal-loudness contour. *The Journal of the Acoustical Society of*  
747 *America*, 144(4), 2363-2374.
- 748 Storey, K. K., Muñoz, K., Nelson, L., Larsen, J., & White, K. (2014). Ambient noise impact on  
749 accuracy of automated hearing assessment. *International Journal of Audiology*, 53(10),  
750 730-736.
- 751 Swanepoel, D. W., Matthysen, C., Eikelboom, R. H., Clark, J. L., & Hall III, J. W. (2015). Pure-  
752 tone audiometry outside a sound booth using earphone attenuation, integrated noise  
753 monitoring, and automation. *International Journal of Audiology*, 54(11), 777-785.
- 754 Swanepoel, D. W., Mngemane, S., Molemong, S., Mkwazazi, H., & Tutshini, S. (2010). Hearing  
755 assessment—reliability, accuracy, and efficiency of automated audiometry. *Telemedicine*  
756 *and e-Health*, 16(5), 557-563.
- 757 Trevino, A. C., Jesteadt, W., & Neely, S. T. (2016). Development of a multi-category  
758 psychometric function to model categorical loudness measurements. *The Journal of the*  
759 *Acoustical Society of America*, 140(4), 2571-2583.
- 760 Wickham, H., Averick, M., Bryan, J., Chang, W., McGowan, L. D. A., François, R., ... & Yutani,  
761 H. (2019). Welcome to the Tidyverse. *Journal of open source software*, 4(43), 1686.

- 762 Xu, C., Hülsmeyer, D., Buhl, M., & Kollmeier, B. (2024a). How Does Inattention Influence the  
763 Robustness and Efficiency of Adaptive Procedures in the Context of Psychoacoustic  
764 Assessments via Smartphone? Manuscript accepted by Trends in Hearing.
- 765 Xu, C., Schell-Majoor, L., & Kollmeier, B. (2024b). Development and verification of non-  
766 supervised smartphone-based methods for assessing pure-tone thresholds and loudness  
767 perception. Manuscript accepted by the International Journal of Audiology.
- 768 Zhao, S., Brown, C. A., Holt, L. L., & Dick, F. (2022). Robust and Efficient Online Auditory  
769 Psychophysics. Trends in hearing, 26, 23312165221118792.
